# Supplementary material
Source: PubMed Central journal article supplement (PMC4297720)
Supplement: NIHMS647343-supplement-1.pdf [file NIHMS647343-supplement-1.pdf]

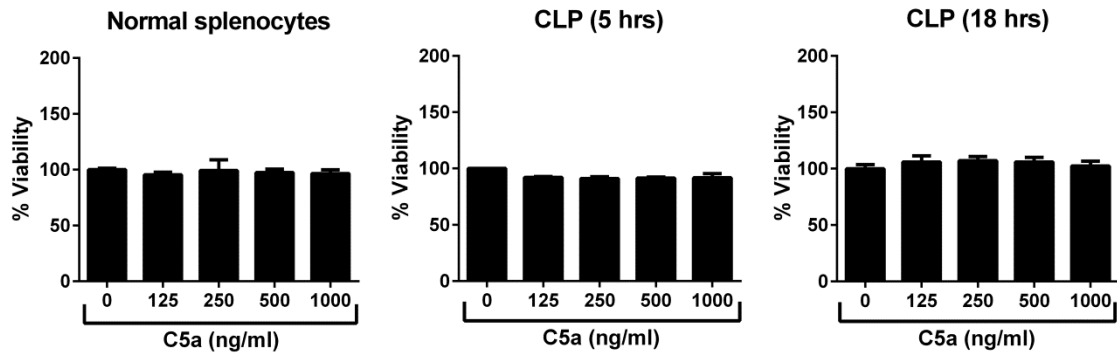

**Supplementary Figure 1.** C5a does not directly induce normal or septic splenocyte death. Wt splenocytes from normal or septic mice (5 or 18 hrs after CLP) were treated with recombinant mouse C5a at the indicated concentrations for 14 hrs. Cell viability was determined by the MTT method. Results are triplicate samples from 3 independent experiments.
